# Supplementary material for: Climate Shocks and Social Networks: Understanding Adaptation among Rural Indian Households
Source: MDPI journal article supplement (doi:10.3390/cli10100149), 2022-10-12
Supplement: s1 [file s1]

Archive with 1 entries (1 files):
- climate-1938218-supplementary.pdf
